# Supplementary material
Source: publisher site journal article supplement (http://kjim.org/upload/media/kjim-2020-629-suppl8.pdf)
Supplement: Supplementary file 1 [file kjim-2020-629-suppl8.pdf]

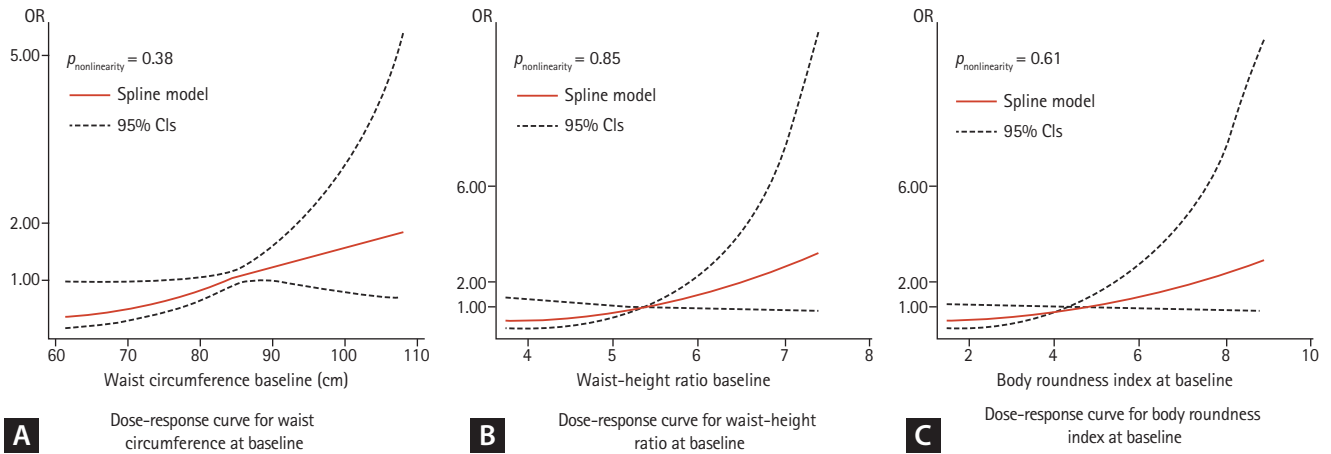

**Supplementary Figure 2.** Dose-response analyses for central fatness at baseline. (A) Dose-response analysis for waist circumference at baseline, (B) dose-response analysis for waist-height ratio at baseline, and (C) dose-response analysis for body roundness index at baseline. All dose-response analyses were modeled with the restricted cubic splines with 3 knots at 10, 50, and 90 percentiles, and controlled for age, sex, body mass index, history of smoking and drinking (yes or no), systolic blood pressure, total cholesterol/high-density lipoprotein cholesterol, uric acid, and walking speed at baseline. OR, odds ratio; CI, confidence interval.
